# Supplementary material for: AMH in Males: Effects of Body Size and Composition on Serum AMH Levels
Source: MDPI journal article supplement (doi:10.3390/jcm12134478), 2023-07-04
Supplement: s1 [file s1]

**Table S1.** Relationships of potential confounders with serum AMH levels – preliminary analysis

| <i>Univariate linear regression model</i> |                      |          |                  |
|-------------------------------------------|----------------------|----------|------------------|
|                                           | <b>R<sup>2</sup></b> | <b>β</b> | <b><i>p</i></b>  |
| age                                       | .021                 | -.004    | <b>&lt;.0001</b> |
| FSH                                       | .157                 | -.017    | <b>&lt;.0001</b> |
| E2                                        | .051                 | -.003    | <b>&lt;.0001</b> |
| Alcohol [dpw]                             | -.001                | -.0001   | .448             |
| Non-smoking                               | -.004                | -.001    | .731             |

\* Goodness-of-fit (R<sup>2</sup>), linear regression coefficient (β) and *p*-value are given for a univariate linear regression model. Transformed AMH values were used (see methods). Abbreviations: FSH, follicle-stimulating hormone; E2, estradiol; dpw, drinks per week. Study cohort (n = 382).

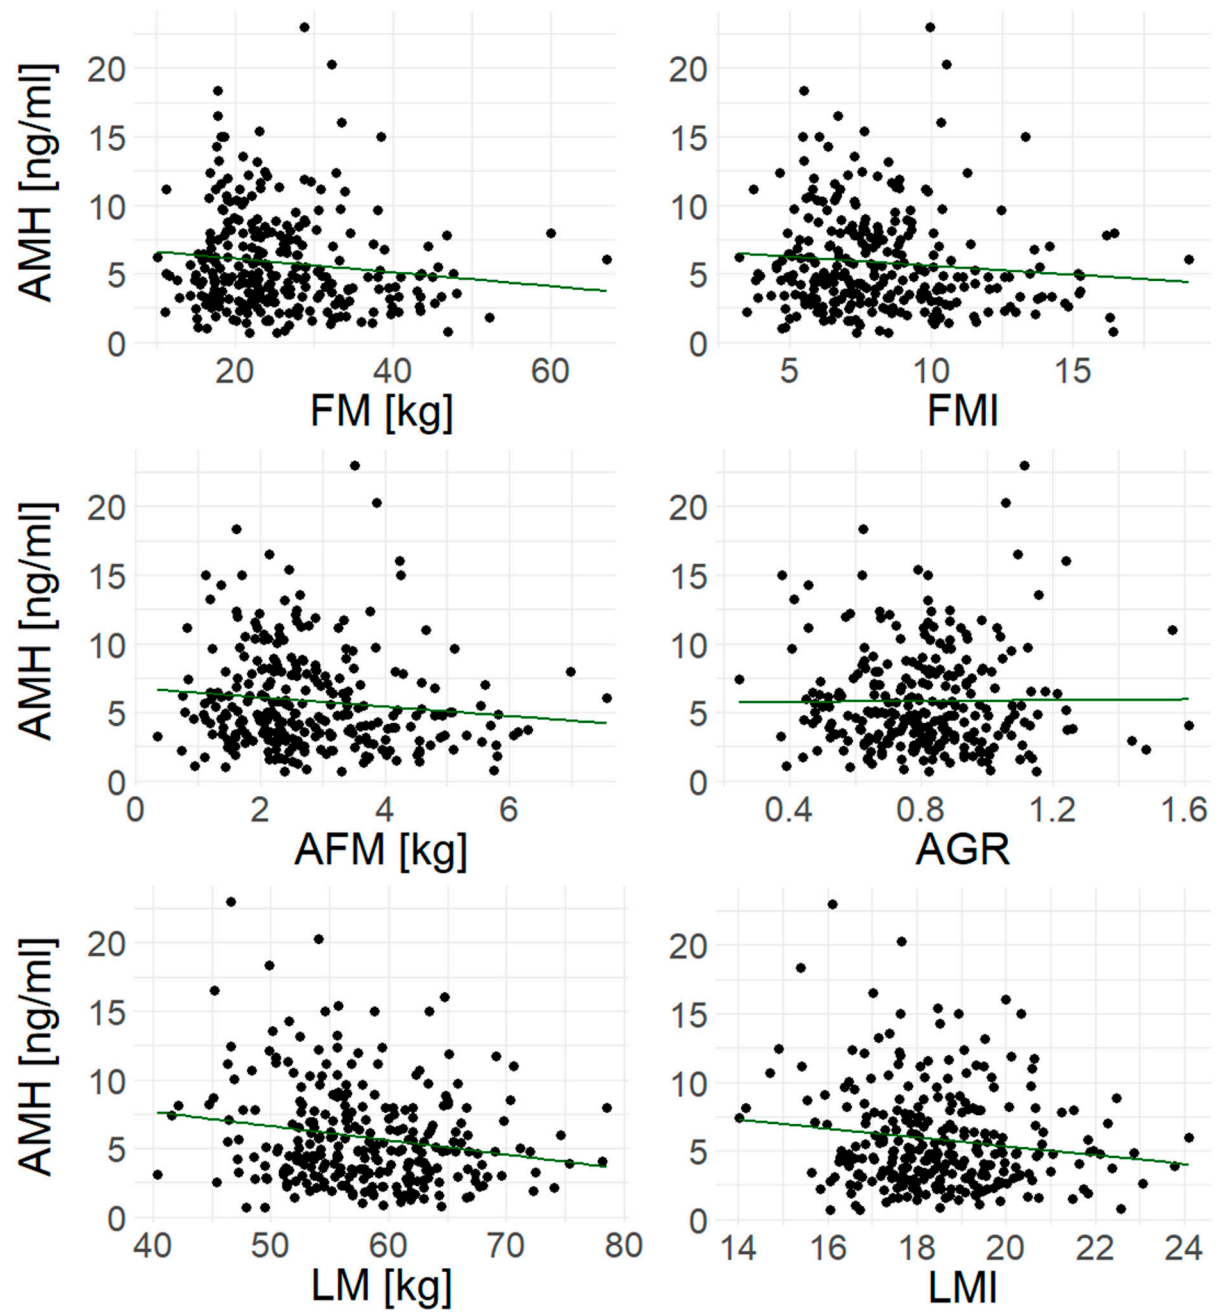

**Figure S1.** Scatterplots of DXA-derived parameters and serum AMH levels with regression line (green). “DXA subset” (n = 278). Abbreviations: FM, fat mass; FMI, fat mass index; AFM, android fat mass; AGR, android-gynoid ratio; LM, lean mass; LMI, lean mass index.

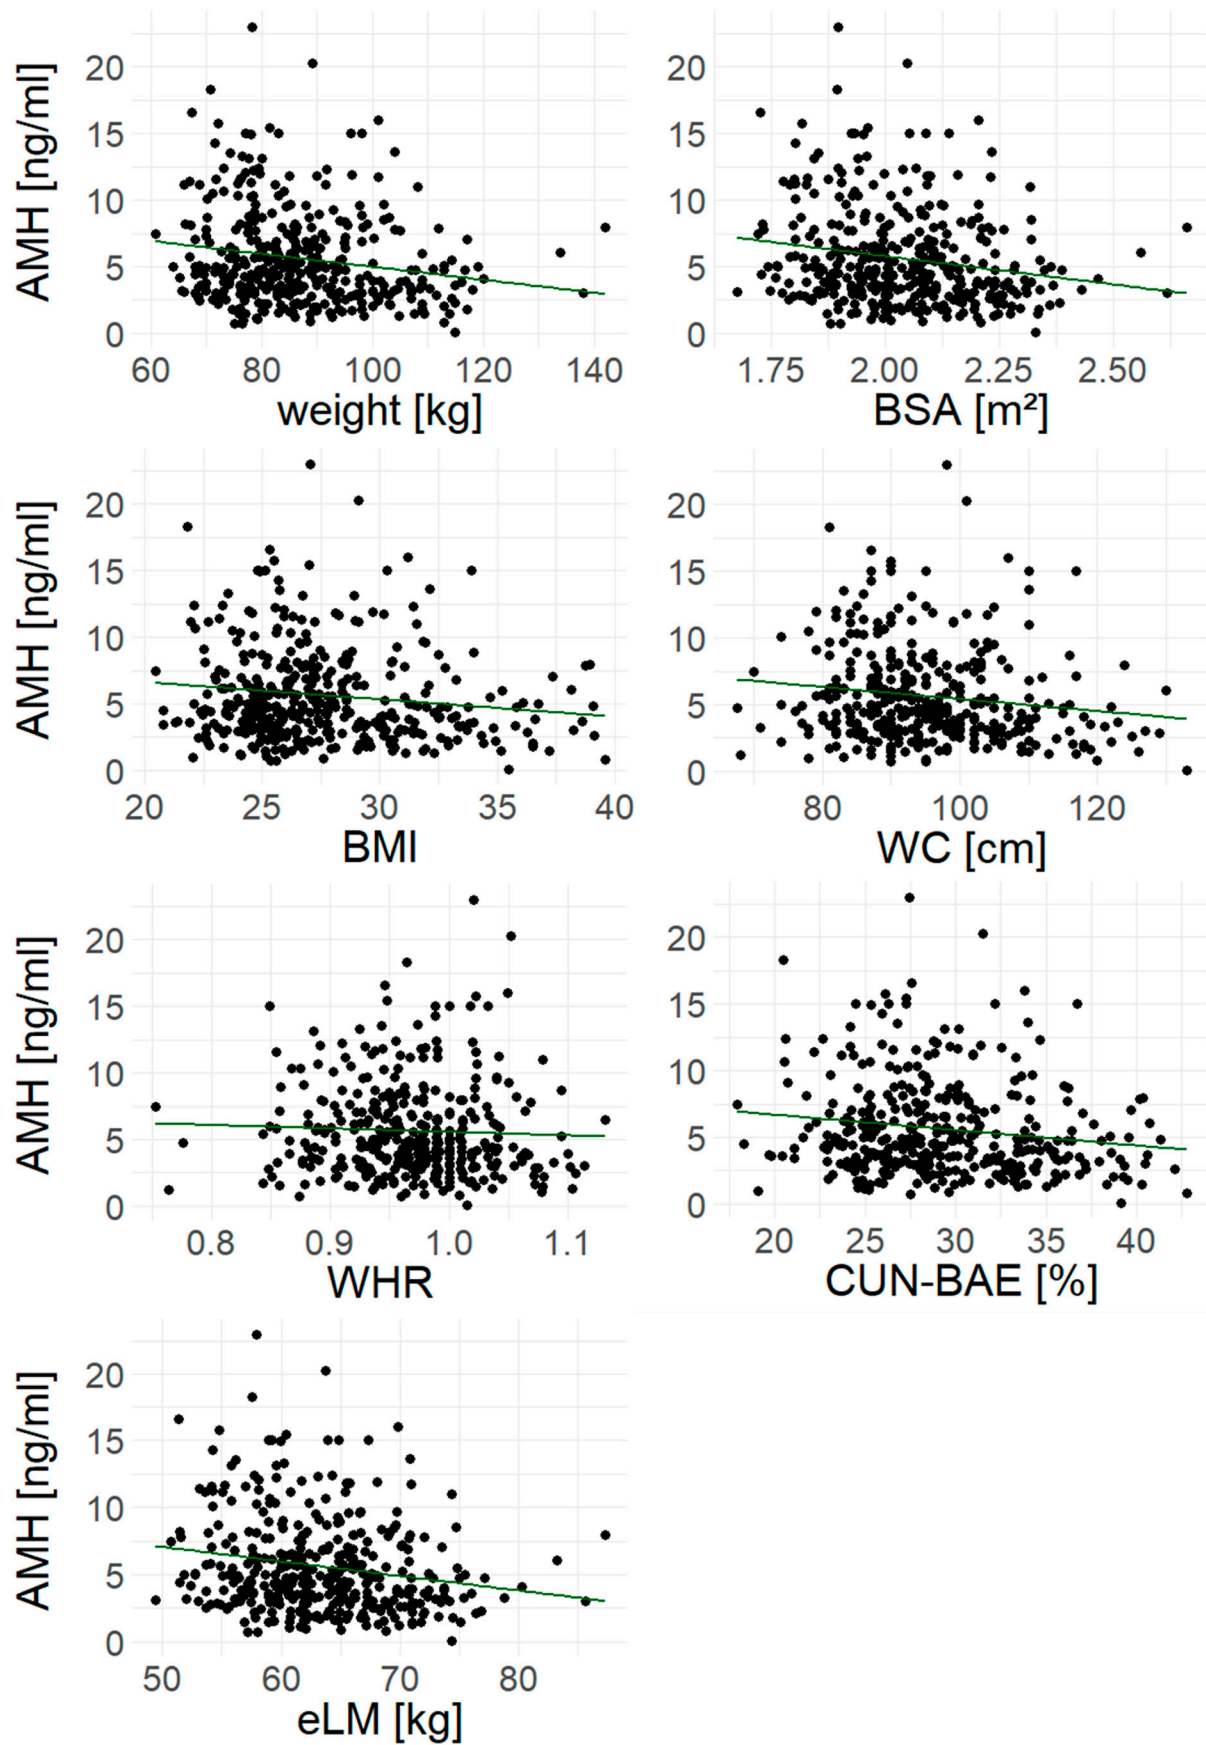

**Figure S2.** Scatterplots of commonly available body composition parameters and serum AMH levels with regression line (green). Whole cohort (n = 382). Abbreviations: BSA, body surface area; BMI, body mass index; WC, waist circumference; WHR, waist-hip ratio; CUN-BAE, Clínica Universidad de Navarra- Body Adiposity Estimator; eLM, estimated lean mass.
